# Supplementary material for: A new role of Yb3+—an energy reservoir for lanthanide upconversion luminescence
Source: Royal Society of Chemistry journal article supplement (doi:10.1039/d0nr08205h), 2021-01-01
Supplement: d0nr08205h1.pdf [file d0nr08205h1.pdf]

## Supporting Information

### **New role of Yb<sup>3+</sup>—energy reservoir for lanthanide upconversion luminescence**

*Li Xu,<sup>a,b</sup> Yu Liu,<sup>a,b</sup> Ziwen Zhou,<sup>a,b</sup> Xianhao Sun,<sup>a,b</sup> Isam Ud Din,<sup>a,b</sup> Yanzeng Li,<sup>c</sup>  
Hanyang Li,<sup>a,c</sup> Jing Ren,<sup>a,b</sup> Joan J. Carvajal,<sup>a,d</sup> Jianzhong Zhang,<sup>\*a,b</sup> Lu Liu<sup>\*a,b</sup>*

*<sup>a</sup>Key Lab of In-fiber Integrated Optics, Ministry Education of China, Harbin Engineering University, Harbin 150001, PR China*

*<sup>b</sup>School of Physics and Optoelectronics Engineering, Harbin Engineering University, Harbin 150001, PR China*

*<sup>c</sup>Department of Physics and Optical Science, University of North Charlotte, Charlotte, North Carolina 28223-0001, USA*

*<sup>d</sup>Departament Química Física i Inorgànica, Física i Cristal·lografia de Materials i Nanomaterials (FiCMA-FiCNA)-EMaS, Campus Sescelades, Universitat Rovira i Virgili, Tarragona, E-43007, Spain*

[\\*zhangjianzhong@hrbeu.edu.cn](mailto:zhangjianzhong@hrbeu.edu.cn); [liulu@hrbeu.edu.cn](mailto:liulu@hrbeu.edu.cn)

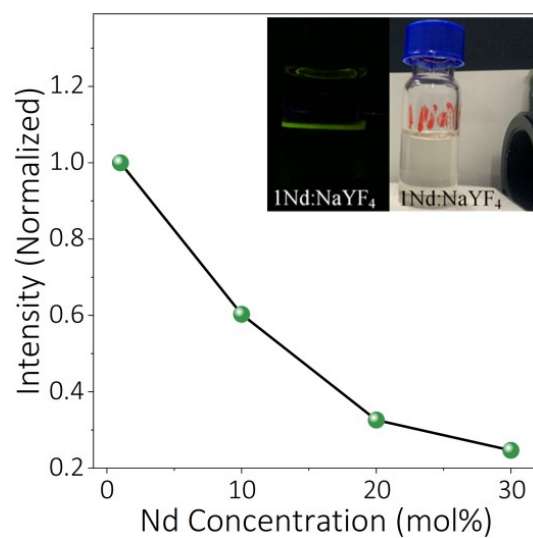

Figure S1. Variation of the integral UC intensity of Nd<sup>3+</sup> single doped NaYF<sub>4</sub> NCs with the Nd<sup>3+</sup> concentration. The integral intensities are normalized by that of 1 mol% Nd<sup>3+</sup> doped NCs. Insets are the dark-field and bright-field luminescent images of the most efficient 1 mol% Nd<sup>3+</sup> doping NaYF<sub>4</sub> NCs dispersed in cyclohexane with a density of ~0.07 mmol/mL excited at a pumping power of ~1.7 W with the 800 nm laser diode.

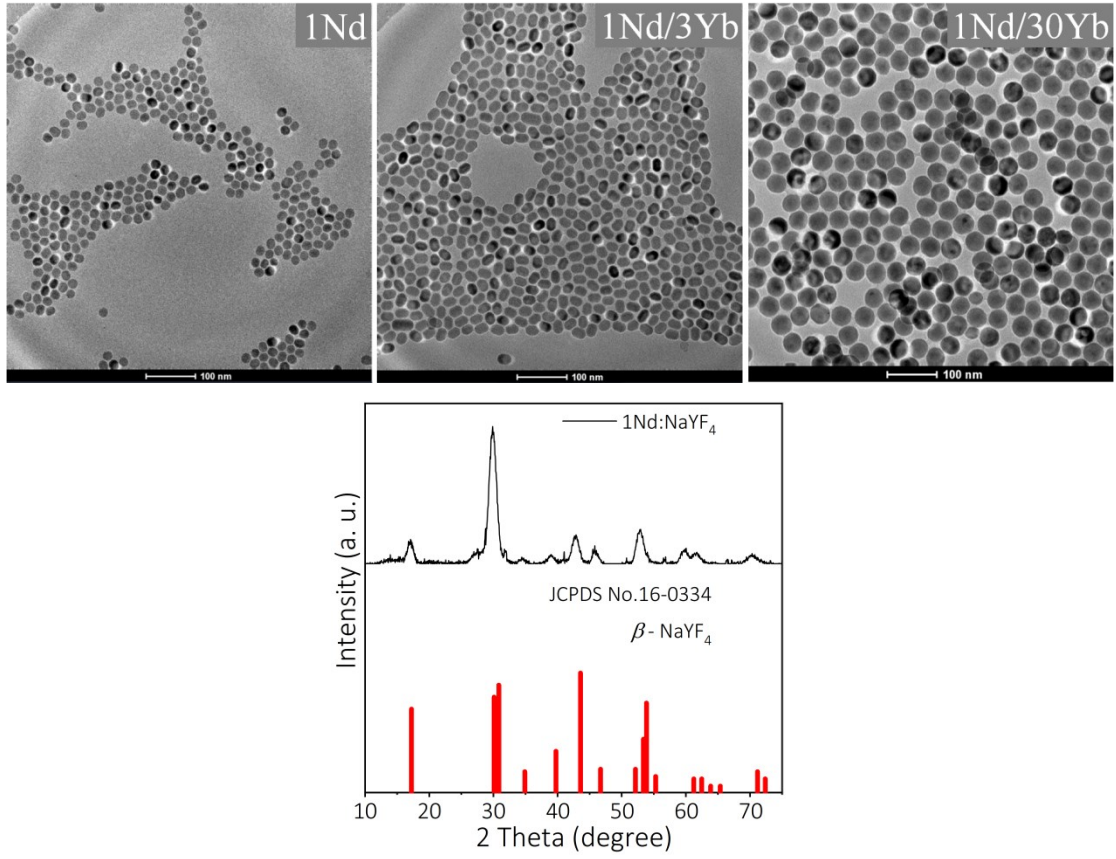

Figure S2. Top: TEM photographs of various Nd<sup>3+</sup>/Yb<sup>3+</sup> codoped NaYF<sub>4</sub> NCs, scale bars are 100 nm. Bottom: XRD pattern of 1 mol% Nd<sup>3+</sup>:NaYF<sub>4</sub>, indicating the hexagonal phase of the formed NCs.

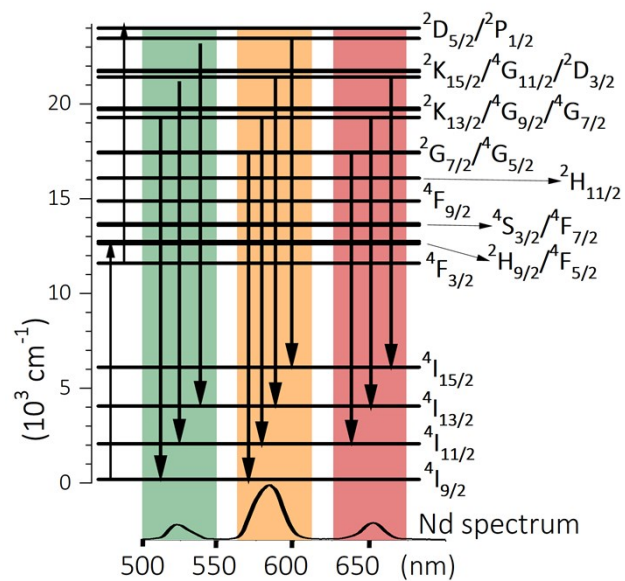

Figure S3. Possible transitions of Nd<sup>3+</sup> overlapping the observed spectrum (bottom of the figure).

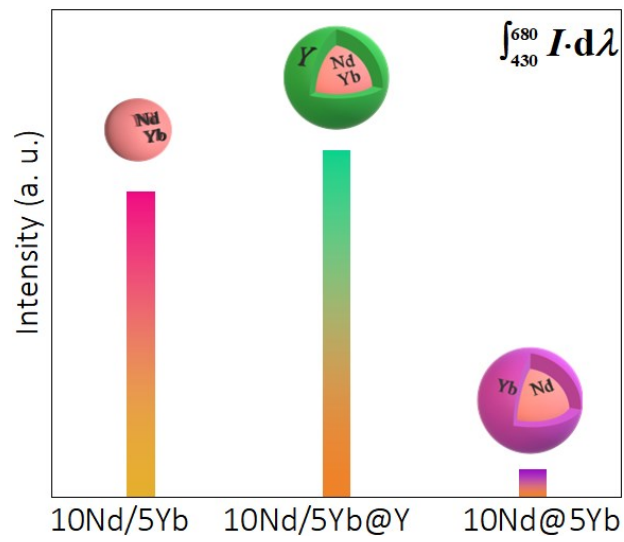

Figure S4. Comparison of the integral UC intensities of  $10\text{Nd}^{3+}/5\text{Yb}^{3+}:\text{NaYF}_4$ ,  $10\text{Nd}^{3+}/5\text{Yb}^{3+}:\text{NaYF}_4@\text{NaYF}_4$ , and  $10\text{Nd}^{3+}:\text{NaYF}_4@5\text{Yb}^{3+}:\text{NaYF}_4$  NCs.

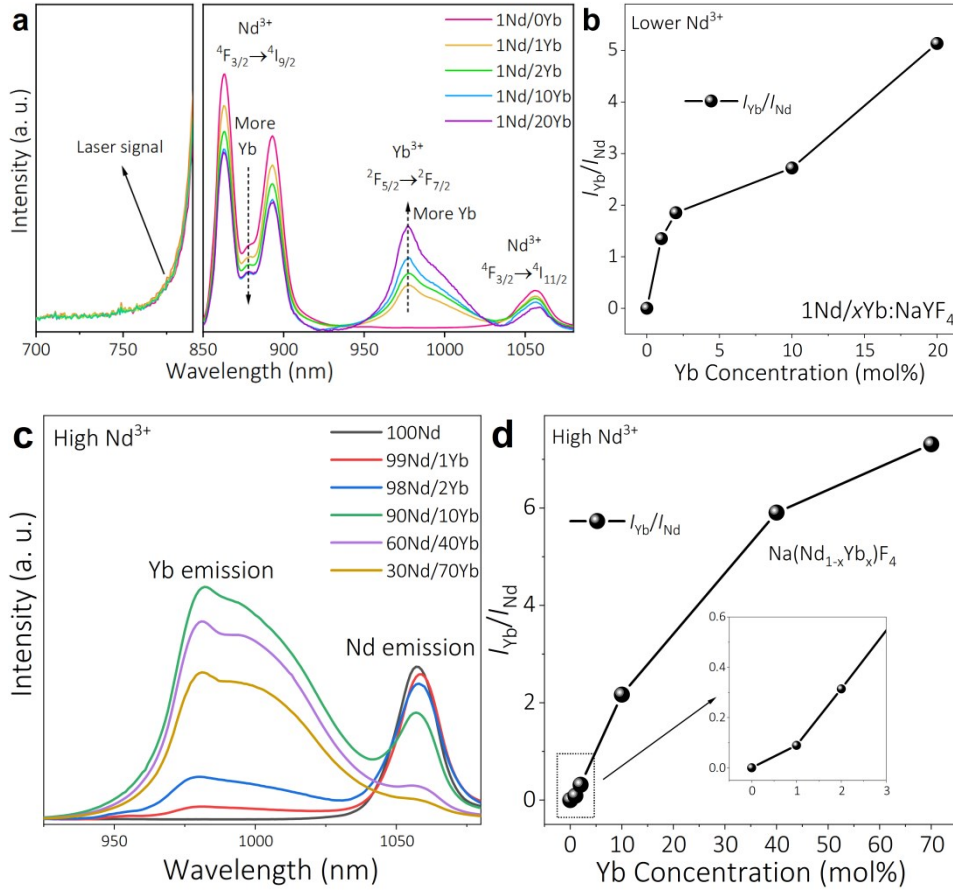

Figure S5. (a) NIR spectra and (b) intensity ratio between the  $\text{Yb}^{3+}$  emission and the  $\text{Nd}^{3+}$  emission in low  $\text{Nd}^{3+}$  doped  $\text{NaYF}_4$  NCs; (c) NIR spectra and (d) intensity ratio between the  $\text{Yb}^{3+}$  emission and the  $\text{Nd}^{3+}$  emission in high  $\text{Nd}^{3+}$  doped  $\text{NaYF}_4$  NCs. The gradually increasing intensity ratio with  $\text{Yb}^{3+}$  concentration in both low  $\text{Nd}^{3+}$  and high  $\text{Nd}^{3+}$  doping situations clearly manifest the FET process of  $\text{Nd}^{3+} \rightarrow \text{Yb}^{3+}$ .

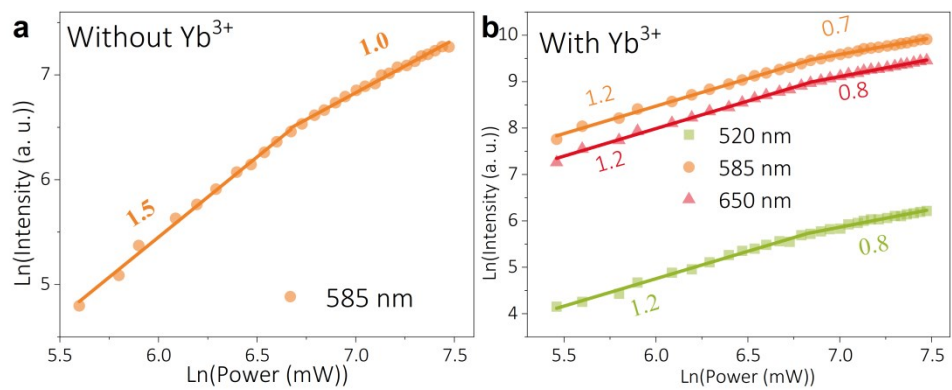

Figure S6. Ln-Ln power dependences of (a)  $\text{Nd}^{3+}$  doped and (b)  $\text{Nd}^{3+}/\text{Yb}^{3+}$  codoped  $\text{NaYF}_4$  NCs.

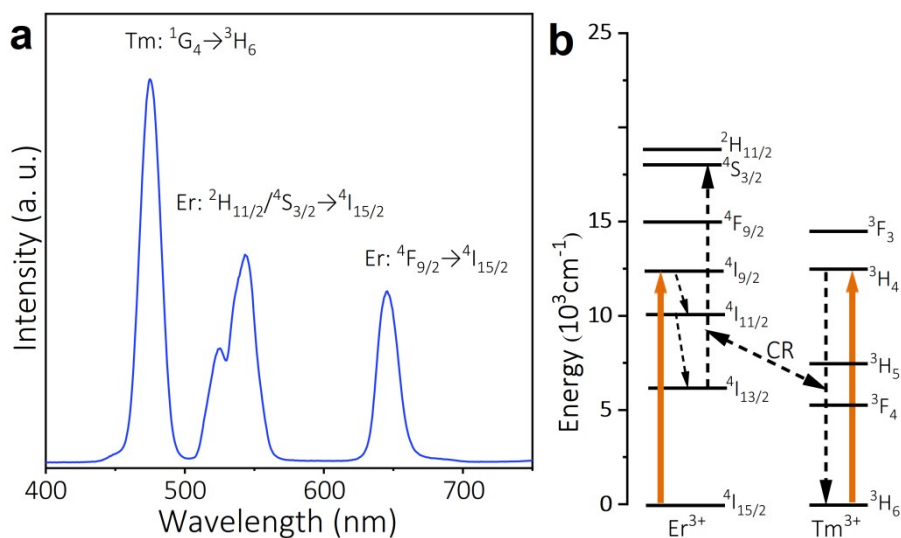

Figure S7. (a) UC spectrum of 0.5Tm<sup>3+</sup>/10Yb<sup>3+</sup> codoped NaYF<sub>4</sub> NCs upon 800 nm excitation. The green and red emission bands of Er<sup>3+</sup> evidence the existence of the Er<sup>3+</sup> impurity. (b) Simplified energy-level diagrams depicting the possible cross-relaxation (CR) quenching mechanisms between Er<sup>3+</sup> and Tm<sup>3+</sup> under 800 nm excitation.



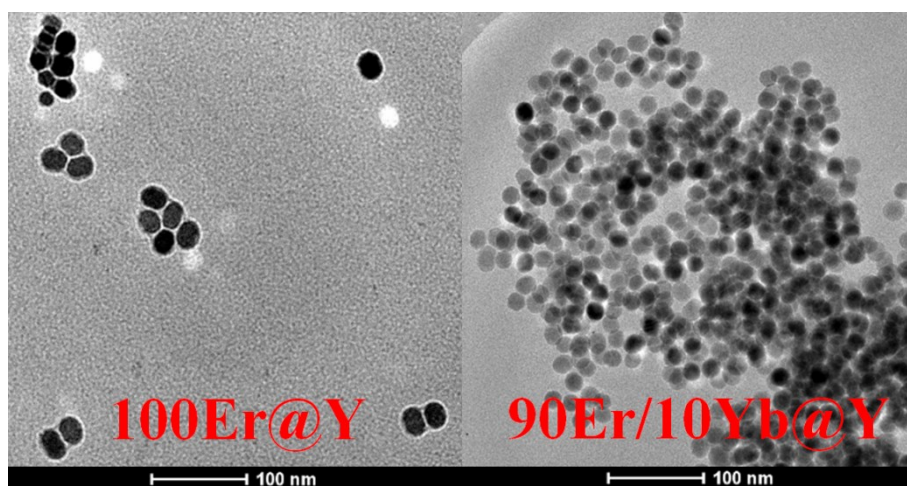

Figure S8. TEM images of  $\text{NaErF}_4@NaYF_4$  and  $\text{Na(Er}_{0.9}/\text{Yb}_{0.1})F_4@NaYF_4$  NCs. Scale bars are 100 nm.

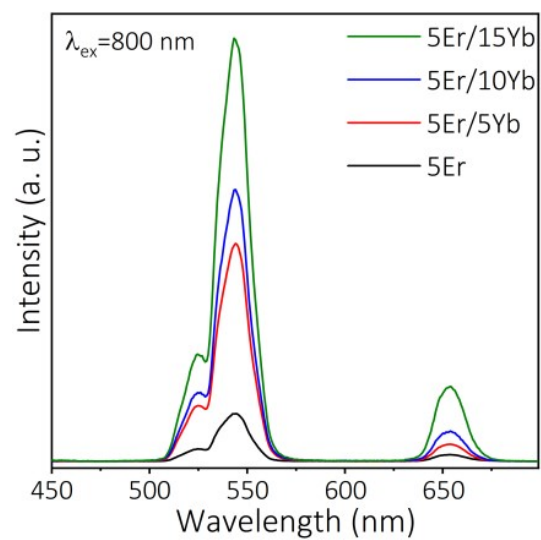

Figure S9. Effects of Yb<sup>3+</sup> on the UC spectra of Er<sup>3+</sup> upon 800 nm excitation in low Er<sup>3+</sup> doped NCs.

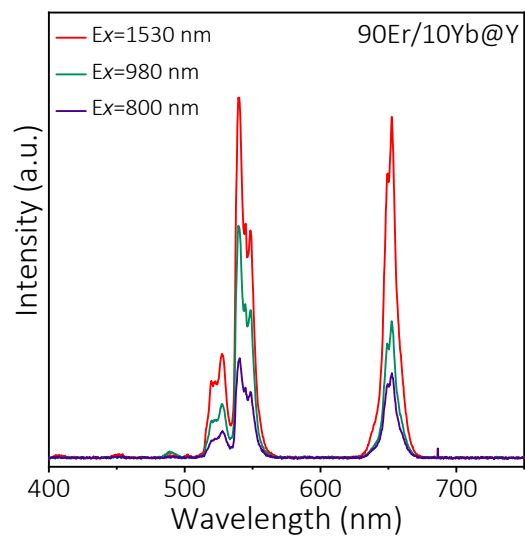

Figure S10. Upconversion spectra of Na(Er/Yb)F<sub>4</sub>@NaYF<sub>4</sub> nanocrystals upon 800, 980, and 1530 nm excitation using identical excitation intensity.

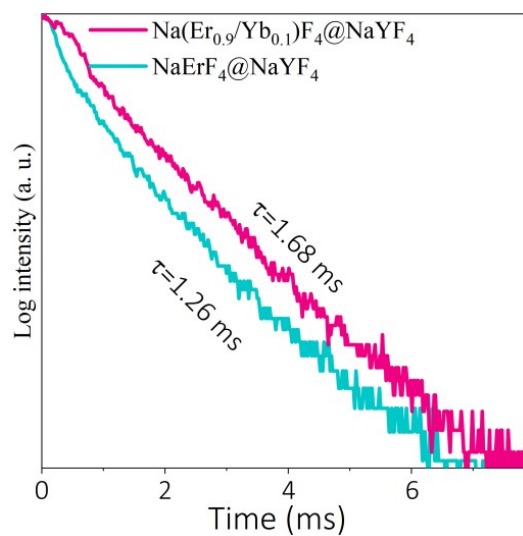

Figure S11. Decay profiles of the Er<sup>3+</sup> 540 nm emission of NaErF<sub>4</sub>@NaYF<sub>4</sub> core-shell NCs and Na(Er<sub>0.9</sub>/Yb<sub>0.1</sub>)F<sub>4</sub>@NaYF<sub>4</sub> core-shell NCs upon 1530 nm excitation.

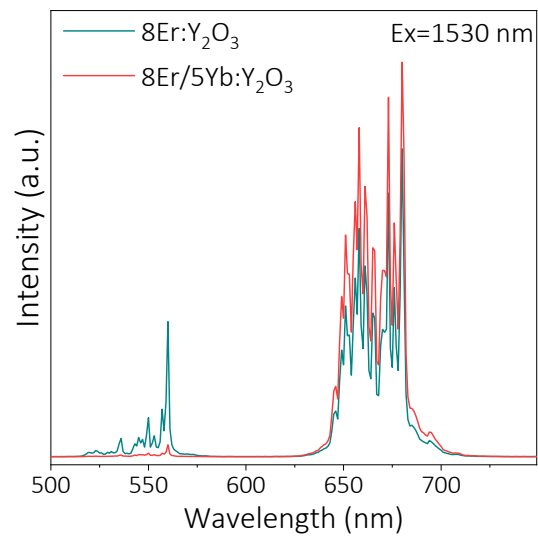

Figure S12. Upconversion spectra of Er<sup>3+</sup>:Y<sub>2</sub>O<sub>3</sub> and Er<sup>3+</sup>/Yb<sup>3+</sup>:Y<sub>2</sub>O<sub>3</sub> ceramics.

Table S1. Integral intensity of visible light of Nd<sup>3+</sup>/Yb<sup>3+</sup>:NaYF<sub>4</sub>. All intensities were normalized to the value of 1 mol% Nd<sup>3+</sup> NCs. Those impossible compositions are labeled as NA. Two typical intensities of 1Nd<sup>3+</sup> and 10Nd<sup>3+</sup>/5Yb<sup>3+</sup> NCs were given in bold font, respectively, corresponding to the most efficient Nd<sup>3+</sup> single doped and Nd<sup>3+</sup>/Yb<sup>3+</sup> co-doped NCs.

|      | 1Nd         | 10Nd        | 20Nd | 30Nd | 40Nd | 60Nd | 90Nd | 100Nd |
|------|-------------|-------------|------|------|------|------|------|-------|
| 0Yb  | <b>1.00</b> | 0.64        | 0.21 | 0.23 | 0.24 |      |      | 0.22  |
| 1Yb  | 1.83        | 2.48        | --   | --   | --   |      |      | NA    |
| 2Yb  | 2.18        | 4.96        | --   | --   | --   |      |      | NA    |
| 3Yb  | 2.30        | 6.25        | --   | --   | --   |      |      | NA    |
| 5Yb  | 1.93        | <b>7.06</b> | 4.89 | 2.87 | 2.25 |      | 1.59 | NA    |
| 10Yb | 1.46        | 6.13        | 3.71 | 3.39 | 3.58 |      | 1.71 | NA    |
| 20Yb | 1.09        | 5.81        | 3.21 | 2.79 | 2.65 |      | NA   | NA    |
| 30Yb | 0.65        | 2.58        | 2.41 | 1.86 | 2.21 |      | NA   | NA    |
| 40Yb | 0.41        |             |      | --   |      | 0.91 | NA   | NA    |
| 60Yb | 0.29        |             |      | --   |      | NA   | NA   | NA    |
| 70Yb | --          |             |      | 0.82 | NA   | NA   | NA   | NA    |
| 80Yb | 0.19        |             |      | NA   | NA   | NA   | NA   | NA    |
| 99Yb | 0.11        | NA          | NA   | NA   | NA   | NA   | NA   | NA    |
